# Supplementary material for: TPGLDA: Novel prediction of associations between lncRNAs and diseases via lncRNA-disease-gene tripartite graph
Source: PubMed Central journal article supplement (PMC5773503; doi:10.1038/s41598-018-19357-3), 2018-01-18
Supplement: 41598_2018_19357_MOESM1_ESM.pdf [file 41598_2018_19357_MOESM1_ESM.pdf]

# **TPGLDA: Novel prediction of associations between lncRNAs and diseases via lncRNA-disease-gene tripartite graph**

**Liang Ding<sup>1,+</sup>, Minghui Wang<sup>1,2,+,\*</sup>, Dongdong Sun<sup>1</sup> and Ao Li<sup>1,2</sup>**

<sup>1</sup>School of Information Science and Technology, University of Science and Technology of China, Hefei AH230027, China

<sup>2</sup>Centers for Biomedical Engineering, University of Science and Technology of China, Hefei AH230027, China

\*Correspondence and requests for materials should be addressed to M.W.(email: [mhwang@ustc.edu.cn](mailto:mhwang@ustc.edu.cn))

<sup>+</sup> These authors contributed equally to this work

## Supplementary Information

**Supplementary Figure 1.** Prediction performance affected by  $\gamma$

**Supplementary Table 1.** The results of the lncRNA expression similarity

**Supplementary Table 2.** The calculated results of the semantic similarity among all diseases.

**Supplementary Table 3.** The predictions of potential lncRNA-disease associations by TPGLDA.

**Supplementary Table 4.** The top 10 prediction results for colorectal cancer, bladder cancer, breast cancer and gastric cancer.

**Supplementary Table 5.** The top 20 potential lncRNA-disease associations ranked by TPGLDA and confirmation for their associations by related databases or literatures. 12 of the top 20 disease-lncRNA associations have been confirmed.

**Supplementary Table 6.** Friedman rank sum test used to determine the statistical significance in the performance improvement of TPGLDA compared to KRWRH and LRLSLDA on our gold dataset.

**Supplementary Table 7.** Comparison between TPGLDA and ncPred using one of the dataset in ncPred

**Supplementary Table 8.** Friedman rank sum test used to determine the statistical significance in the performance improvement of TPGLDA compared to ncPred on Chen's dataset.

**Supplementary Table 9.** Running time comparison of TPGLDA, KRWRH and LRLSLDA.

# Figure

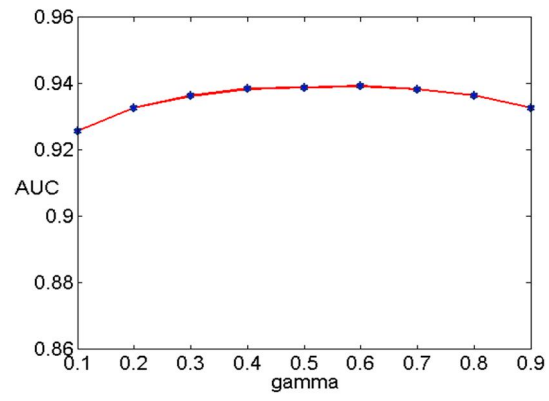

**Figure 1.** Prediction performance affected by  $\gamma$ .

## Table

| LncRNA                   | TPGLDA's rank | LncRNA     | TPGLDA's rank |
|--------------------------|---------------|------------|---------------|
| <b>Colorectal Cancer</b> |               |            |               |
| TUG1                     | 1             | BC040587   | 6             |
| GHET1                    | 2             | CDKN2B-AS1 | 7             |
| SPRY4-IT1                | 3             | LINC00261  | 8             |
| DNM3OS                   | 4             | SOX2-OT    | 9             |
| MINA                     | 5             | HIF1A-AS2  | 10            |
| <b>Bladder Cancer</b>    |               |            |               |
| PVT1                     | 1             | BANCR      | 6             |
| CCAT2                    | 2             | CDKN2B-AS1 | 7             |
| CCAT1                    | 3             | LSINCT5    | 8             |
| HULC                     | 4             | RPL34-AS1  | 9             |
| TUSC7                    | 5             | MINA       | 10            |
| <b>Breast Cancer</b>     |               |            |               |
| CHL1-AS2                 | 1             | MINA       | 6             |
| BANCR                    | 2             | TUSC7      | 7             |
| HULC                     | 3             | DNM3OS     | 8             |
| CCAT1                    | 4             | MNX1-AS1   | 9             |
| TUG1                     | 5             | GHET1      | 10            |
| <b>Gastric Cancer</b>    |               |            |               |
| TUG1                     | 1             | HOTTIP     | 6             |
| XIST                     | 2             | MNX1-AS1   | 7             |
| SNHG16                   | 3             | NPTN-IT1   | 8             |
| KCNQ1OT1                 | 4             | HIF1A-AS1  | 9             |
| NEAT1                    | 5             | PANDAR     | 10            |

**Table S4.** The top 10 prediction results for colorectal cancer, bladder cancer, breast cancer and gastric cancer.

| Rank | Diseases                   | lncRNAs    | Evidences(PMID)                 | Description               |
|------|----------------------------|------------|---------------------------------|---------------------------|
| 1    | epithelial ovarian cancer  | H19        | Unconfirmed                     | Unconfirmed               |
| 2    | epithelial ovarian cancer  | MALAT1     | Unconfirmed                     | Unconfirmed               |
| 3    | epithelial ovarian cancer  | CDKN2B-AS1 | Unconfirmed                     | Unconfirmed               |
| 4    | osteosarcoma               | H19        | PMID:27008415                   | literature                |
| 5    | osteosarcoma               | HOTAIR     | PMID:25728753                   | Lnc2Cancer                |
| 6    | epithelial ovarian cancer  | MEG3       | PMID:24859196                   | Lnc2Cancer                |
| 7    | osteosarcoma               | CDKN2B-AS1 | PMID:26408699                   | Lnc2Cancer                |
| 8    | osteosarcoma               | MEG3       | PMID:26823857                   | Lnc2Cancer                |
| 9    | small cell lung cancer     | H19        | Unconfirmed                     | Unconfirmed               |
| 10   | cervical cancer            | CDKN2B-AS1 | PMID:22487937,<br>PMID:27008415 | Lnc2Cancer,<br>literature |
| 11   | epithelial ovarian cancer  | GAS5       | Unconfirmed                     | Unconfirmed               |
| 12   | non-small cell lung cancer | H19        | PMID:26482621                   | Lnc2Cancer                |
| 13   | renal cancer               | MALAT1     | PMID:26461224                   | Lnc2Cancer                |
| 14   | cervical cancer            | PVT1       | PMID:27272214,<br>PMID:27232880 | Lnc2Cancer,<br>literature |
| 15   | epithelial ovarian cancer  | PVT1       | Unconfirmed                     | Unconfirmed               |
| 16   | osteosarcoma               | PVT1       | PMID:27813492                   | literature                |
| 17   | psoriasis                  | CDKN2B-AS1 | Unconfirmed                     | Unconfirmed               |
| 18   | renal cancer               | H19        | PMID:25866221                   | literature                |
| 19   | osteosarcoma               | GAS5       | Unconfirmed                     | Unconfirmed               |
| 20   | renal cancer               | HOTAIR     | PMID:24616104                   | Lnc2Cancer                |

**Table S5.** The top 20 potential lncRNA-disease associations ranked by TPGLDA and confirmation for their associations by

| Dataset            | Friedman $\chi^2$ | p-Value                 |
|--------------------|-------------------|-------------------------|
| Our golden dataset | 133.8             | $< 2.2 \times 10^{-16}$ |

**Table S6.** Friedman rank sum test used to determine the statistical significance in the performance improvement of TPGLDA compared to KRWRH and LRLSLDA on our golden dataset.

| Dataset            | AUC           |               |
|--------------------|---------------|---------------|
|                    | TPGLDA        | ncPred        |
| Chen et al. (2013) | 0.7586±0.0306 | 0.7566±0.0218 |

**Table S7** Comparison between TPGLDA and ncPred using one of the dataset in ncPred.

| Dataset            | Friedman $\chi^2$ | p-Value |
|--------------------|-------------------|---------|
| Chen et al. (2013) | 1.2               | 0.2733  |

**Table S8.** Friedman rank sum test used to determine the statistical significance in the performance improvement of TPGLDA compared to ncPred on Chen et al dataset.

| Methods              | TPGLDA | KRWRH | LRLSLDA |
|----------------------|--------|-------|---------|
| Running time/seconds | 0.61   | 28    | 0.22    |

**Table S9.** Running time comparison of TPGLDA, KRWRH and LRLSLDA.
